# Supplementary material for: Effective Removal of Sulfonamides Using Recyclable MXene-Decorated Bismuth Ferrite Nanocomposites Prepared via Hydrothermal Method
Source: MDPI journal article supplement (doi:10.3390/molecules28041541), 2023-02-05
Supplement: s1 [file s1]

# **Effective removal of sulfonamides using recyclable MXene decorated bismuth ferrite nanocomposites prepared via hydrothermal method**

Pascaline Sanga <sup>a,b</sup>, Juanjuan Wang <sup>a</sup>, Xin Li <sup>a</sup>, Jia Chen <sup>a</sup>, Hongdeng Qiu <sup>a,b,c,\*</sup>

<sup>a</sup> CAS Key Laboratory of Chemistry of Northwestern Plant Resources and Key Laboratory for Natural Medicine of Gansu Province, Lanzhou Institute of Chemical Physics, Chinese Academy of Sciences, Lanzhou 730000, China.

<sup>b</sup> University of Chinese Academy of Sciences, Chinese Academy of Sciences, Beijing 100039, China.

<sup>c</sup> College of Chemistry, Zhengzhou University, Zhengzhou 450001, China.

\* Corresponding e-mail: [hdqiu@licp.cas.cn](mailto:hdqiu@licp.cas.cn) (H. Qiu)

## **HPLC Conditions**

The concentrations of the six sulfonamides were analyzed by HPLC (1260 Infinity series, Agilent Technologies, USA) using a ZORBAX SB-C18 column (5  $\mu$ m, 4.6 mm $\times$ 250 mm i.d.) as a stationary phase and UV detector. The mobile phase was D-0.2% acetic acid aqueous solution, C-methanol, The gradient elution procedure was 0-3 min:10% methanol; 3-4 min:10%-20% methanol; 4 min-8 min 20 % methanol; 8 min-15 min 20%-30% methanol; 15 min-17 min 30%~45% methanol and the wavelength of the UV detector was 250 nm. The flow rate was 1 mL/ min, and the column temperature was 25 °C. The injection volume was 10  $\mu$ L.

**Table S1.** Selected characteristics of the six sulfonamides

| Name             | Molecular structure                                                                 | Molecular formula                                                          | Molecular |           | Water      |
|------------------|-------------------------------------------------------------------------------------|----------------------------------------------------------------------------|-----------|-----------|------------|
|                  |                                                                                     |                                                                            | weight    | pKa       | Solubility |
|                  |                                                                                     |                                                                            | (g/mol)   |           | (mg/mL)    |
| Sulfadiazine     | 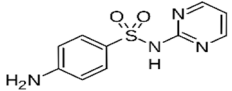   | C <sub>10</sub> H <sub>10</sub> N <sub>4</sub> O <sub>2</sub> S            | 250.277   | 6.41±0.14 | 4.12       |
| Sulfathiazole    |    | C <sub>9</sub> H <sub>9</sub> N <sub>3</sub> O <sub>2</sub> S <sub>2</sub> | 255.317   | 7.15±0.12 | 0.921      |
| Sulfamerazine    |    | C <sub>11</sub> H <sub>12</sub> N <sub>4</sub> O <sub>2</sub> S            | 264.304   | 6.92±0.14 | 0.304      |
| Sulfamethazine   |    | C <sub>12</sub> H <sub>14</sub> N <sub>4</sub> O <sub>2</sub> S            | 278.33    | 7.56±0.26 | 0.23       |
| Sulfamethoxazole |  | C <sub>10</sub> H <sub>11</sub> N <sub>3</sub> O <sub>3</sub> S            | 253.278   | 5.73±0.20 | 0.459      |
| Sulfisoxazole    |  | C <sub>11</sub> H <sub>13</sub> N <sub>3</sub> O <sub>3</sub> S            | 267.304   | 5.00±0.00 | 0.313      |

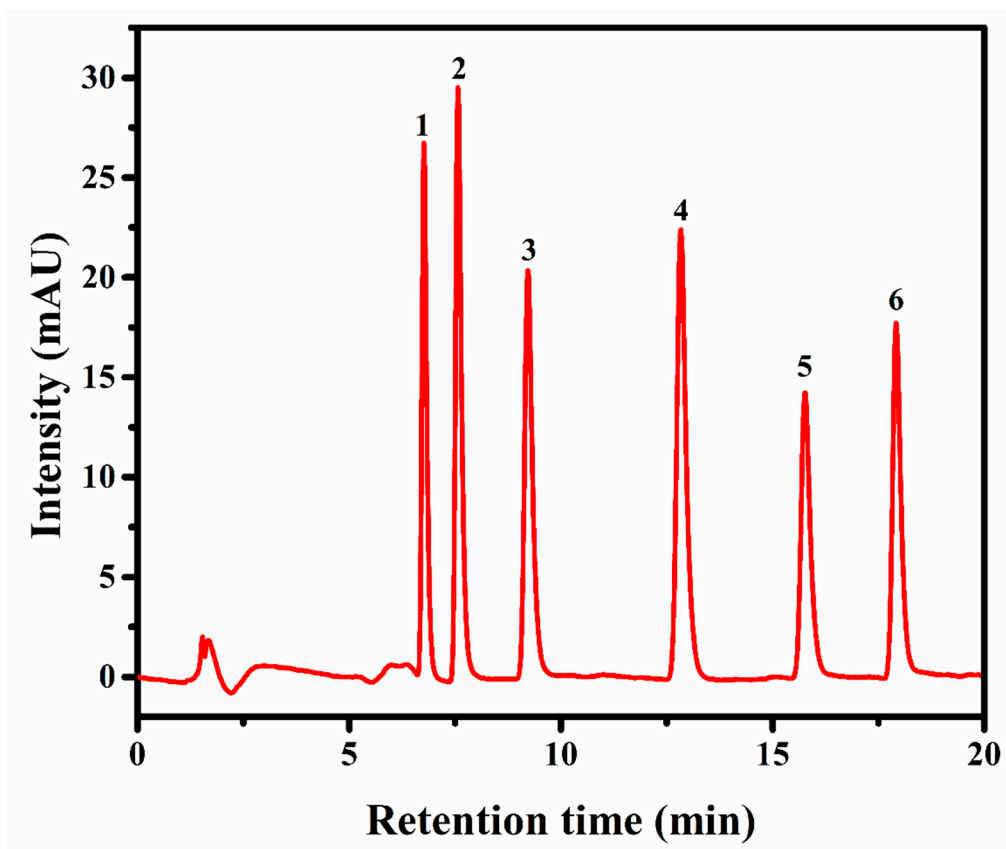

**Figure S1.** Chromatogram of the six sulfonamides. sulfadiazine (1), sulfathiazole (2), sulfamerazine (3), sulfamethazine (4), sulfamethoxazole (5), and sulfisoxazole (6).

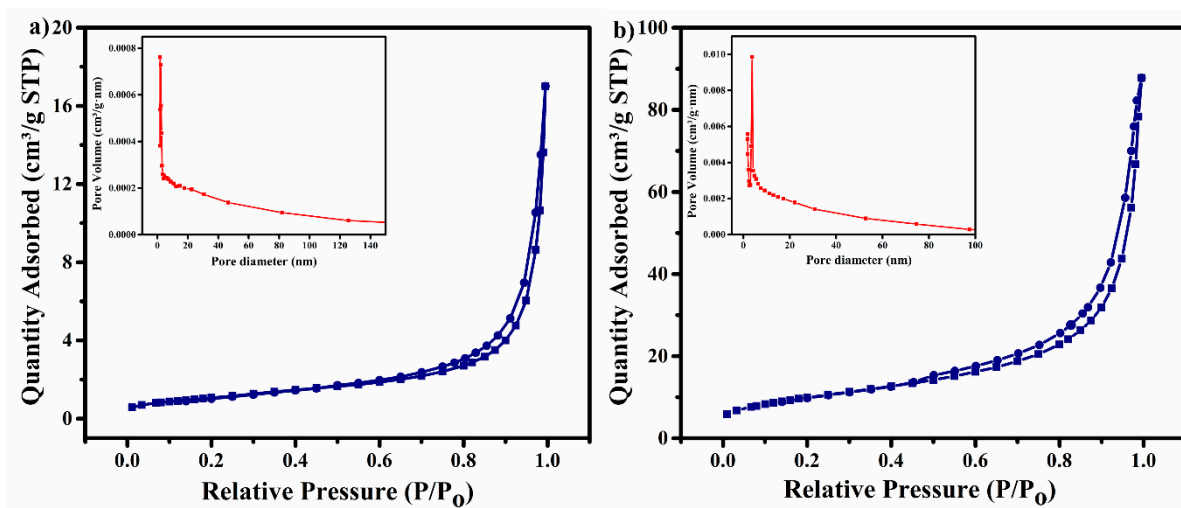

**Figure S2.**  $N_2$  adsorption-desorption isotherms of a)MXene and b)BiFeO<sub>3</sub>/MXene, insert is their corresponding pore size distribution.

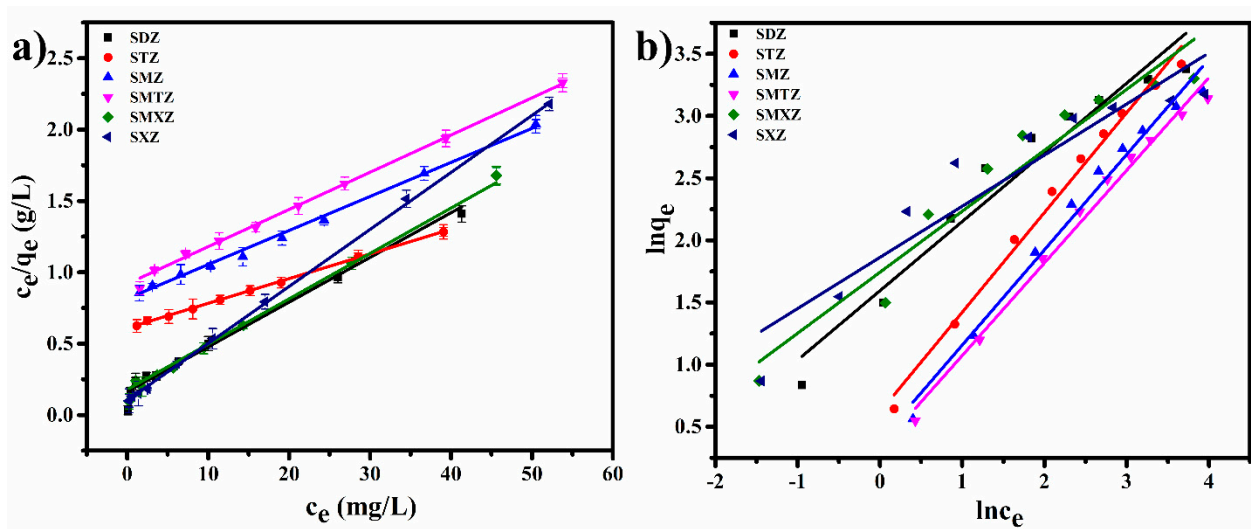

**Figure S3.** a) Linear Langmuir and b) Freundlich fitting curves for sulfonamides adsorption on BiFeO<sub>3</sub>/MXene in a single system at pH of 6 for SDZ, STZ, SMZ, and SMTZ, and pH of 5 for SMXZ and SXZ.

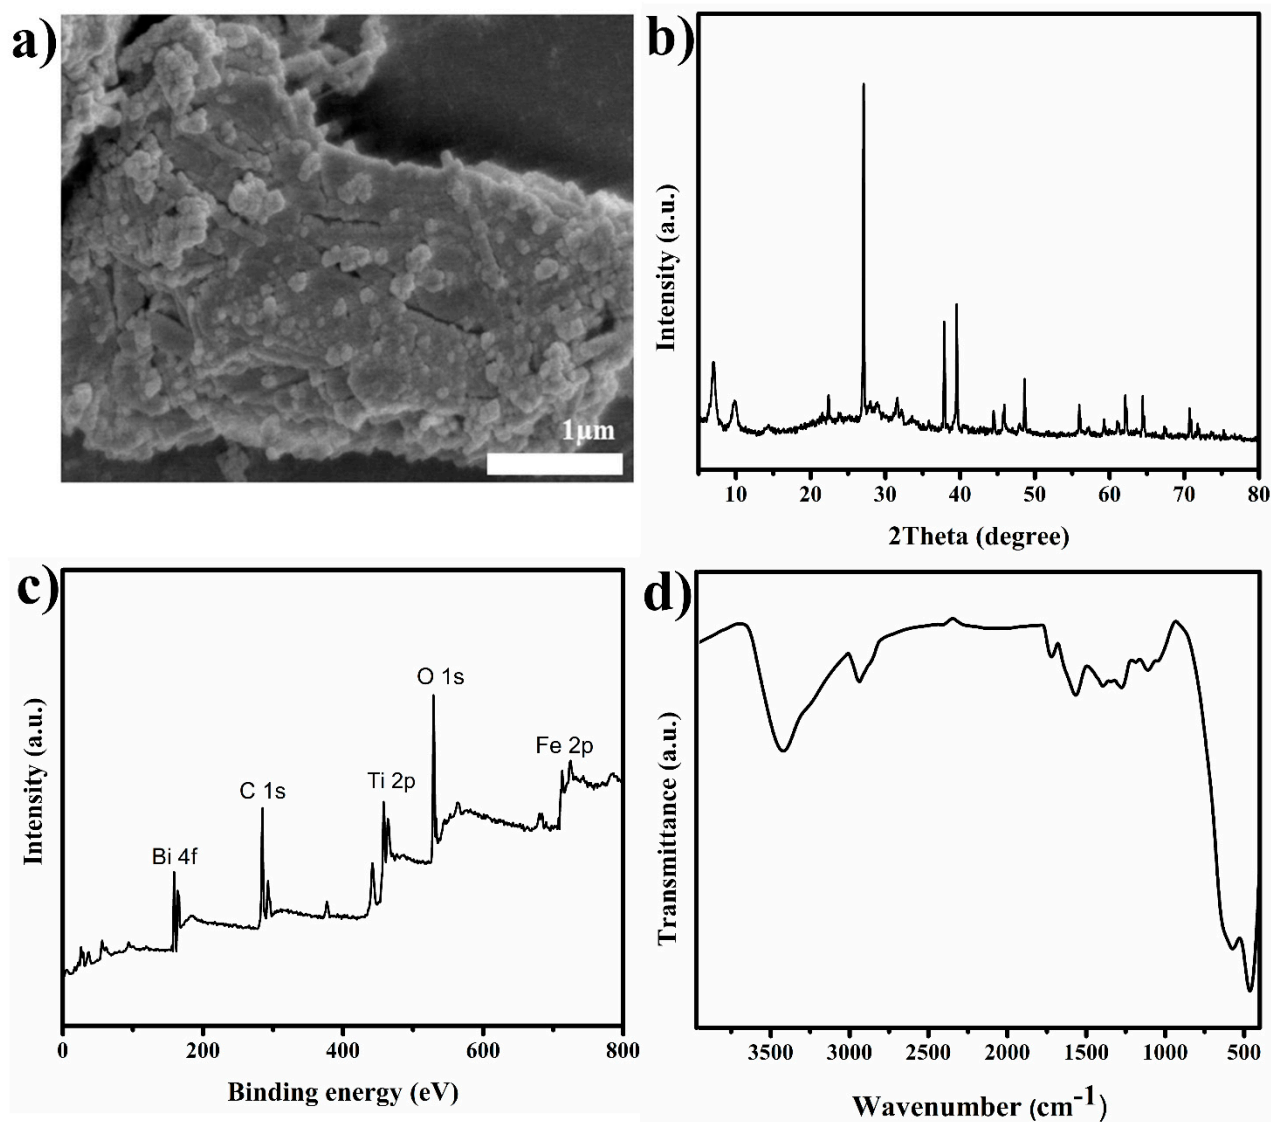

**Figure S4.** a) SEM, b) XRD, c)XPS, and d) FT-IR of BiFeO<sub>3</sub>/MXene after desorption.

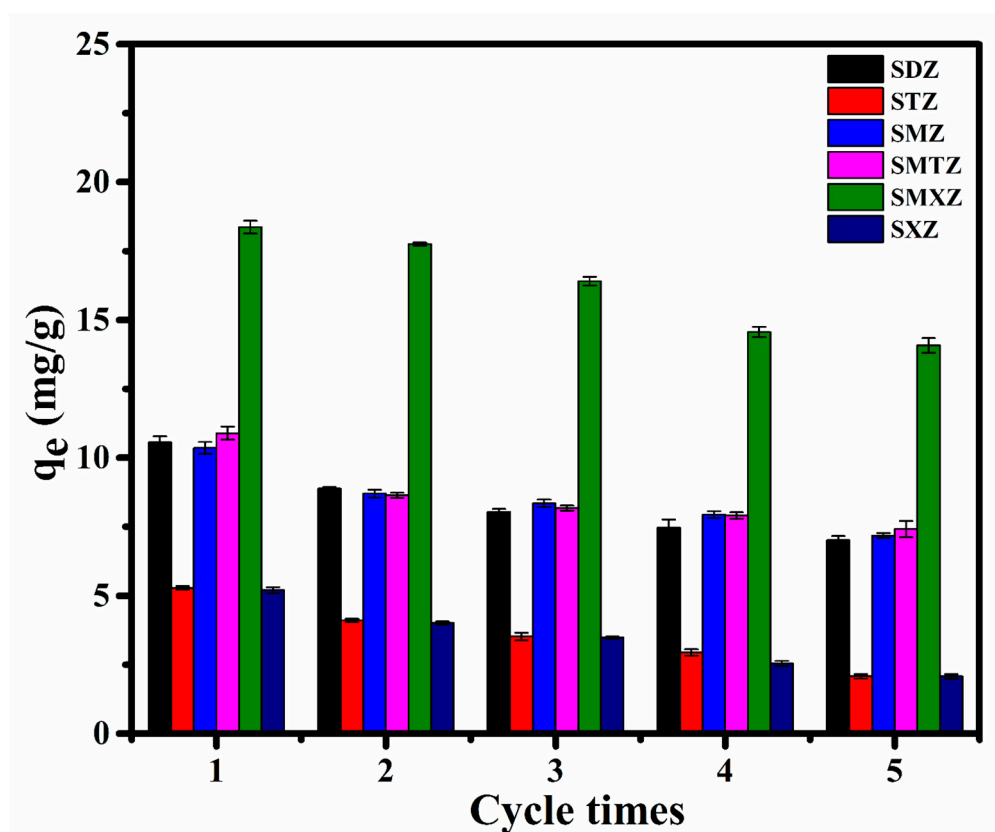

**Figure S5.** The recyclability of BiFeO<sub>3</sub>/MXene on adsorption of sulfonamides.

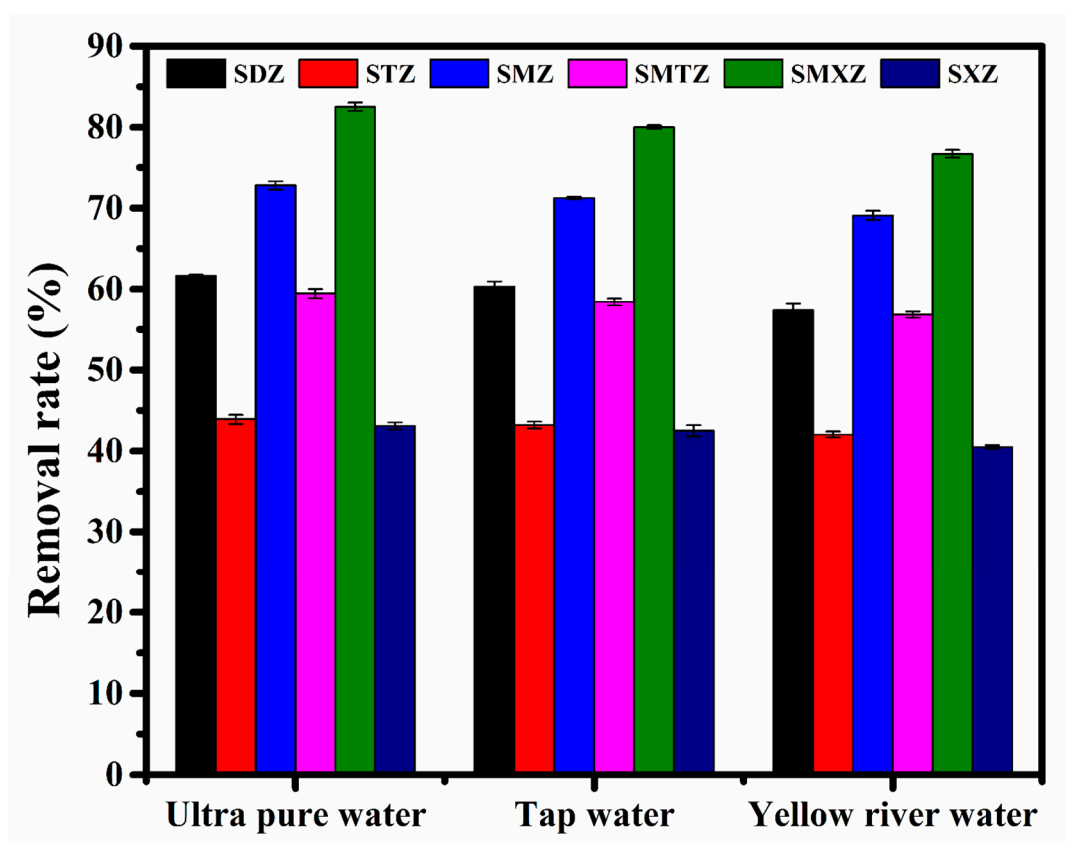

Figure S6. Removal rate of BiFeO<sub>3</sub>/MXene on sulfonamides.
